# Supplementary material for: LiCoO2 impregnated nano-hierarchical ZSM-5 assisted catalytic upgrading of Kraft lignin-derived liquefaction bio-oil
Source: Royal Society of Chemistry journal article supplement (doi:10.1039/d4nr00358f), 2024-01-01

## Supplementary Information

For

### LiCoO<sub>2</sub> impregnated nano hierarchical HZSM-5 assisted catalytic upgrading of Kraft lignin derived liquefaction bio-oil

Ashutosh Agarwal<sup>1,2\*</sup>, Xue Li<sup>3\*\*</sup>

<sup>1</sup>Department of Environment and Energy Engineering, Chonnam National University, Gwangju  
61186, Republic of Korea

<sup>2</sup>Engineering Product Development, Singapore University of Technology and Design, 8 Somapah  
Road, 487372, Singapore

<sup>3</sup>Department of Materials Science and Engineering, Luoyang Institute of Science and Technology,  
Louyang, 471023, P.R. China

\*E-mail: ashutosh\_agarwal@sutd.edu.sg; \*  0000-0002-3007-1091

\*\*E-mail: lixue0377@lit.edu.cn

**Table S1.** Actual metal contents of all the synthesized LiCoO<sub>2</sub> and Co<sub>3</sub>O<sub>4</sub> loaded HZSM--5 catalysts.

| Catalysts                                       | Li (wt %) | Co (wt %) |
|-------------------------------------------------|-----------|-----------|
| 5% Co (LiCoO <sub>2</sub> )/HZSM-5              | 0.57      | 4.81      |
| 10% Co (LiCoO <sub>2</sub> )/HZSM-5             | 1.06      | 9.63      |
| 20% Co (LiCoO <sub>2</sub> )/HZSM-5             | 2.27      | 19.22     |
| 5% Co (Co <sub>3</sub> O <sub>4</sub> )/HZSM-5  | -         | 4.85      |
| 10% Co (Co <sub>3</sub> O <sub>4</sub> )/HZSM-5 | -         | 9.74      |
| 20% Co (Co <sub>3</sub> O <sub>4</sub> )/HZSM-5 | -         | 19.38     |

**Figure S1** Schematic illustration of the experimental procedure.

### Schematic of the Experimental Procedure

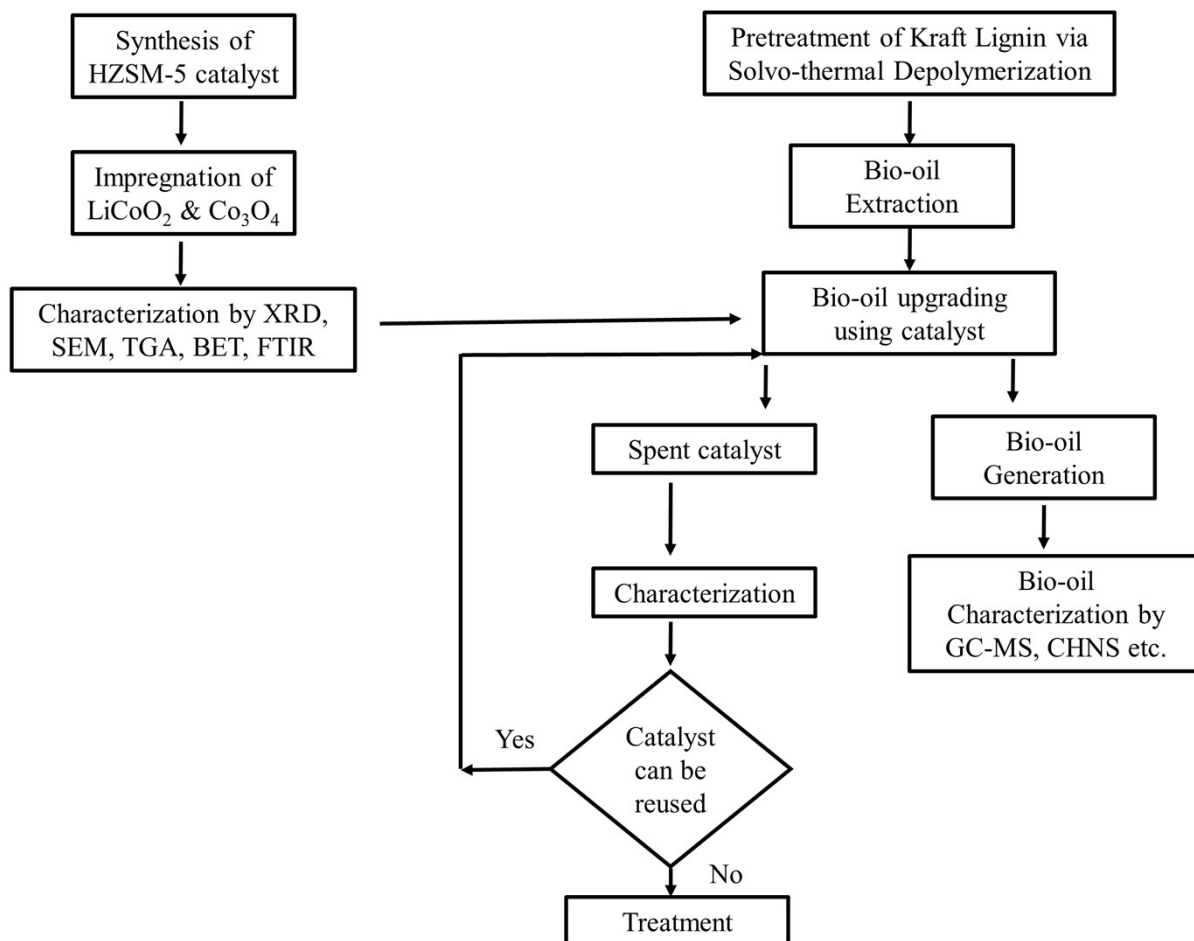

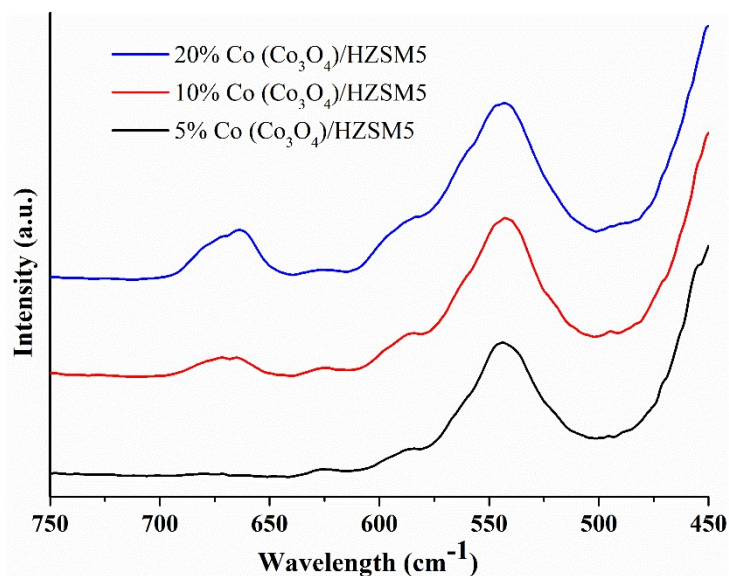

**Figure S2.** FTIR absorption spectra of all the synthesized Co<sub>3</sub>O<sub>4</sub>/HZSM-5 catalysts.

**Figure S3.** FTIR absorption spectra of all the synthesized LiCoO<sub>2</sub>/HZSM-5 catalysts.

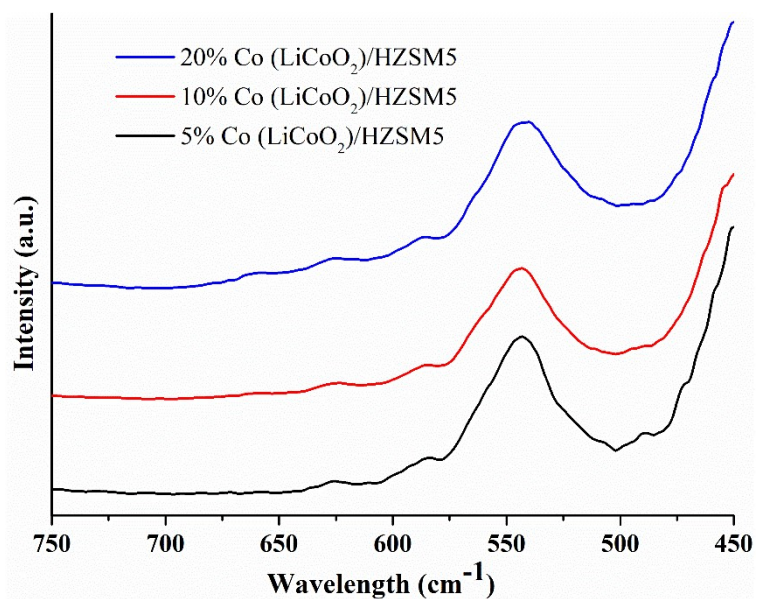

Supplement: d4nr00358f1.pdf [file d4nr00358f1.pdf]
